# Supplementary material for: Development of cryopreservation media for the slow-freezing of cultured primordial germ cells in chicken
Source: PubMed Central journal article supplement — J Reprod Dev. 2023 Feb 28;69(2):109–17. doi: 10.1262/jrd.2022-123 (PMC10085767; doi:10.1262/jrd.2022-123), 2023-02-28
Supplement: jrd-69-109-s001.pdf [file jrd-69-109-s001.pdf]

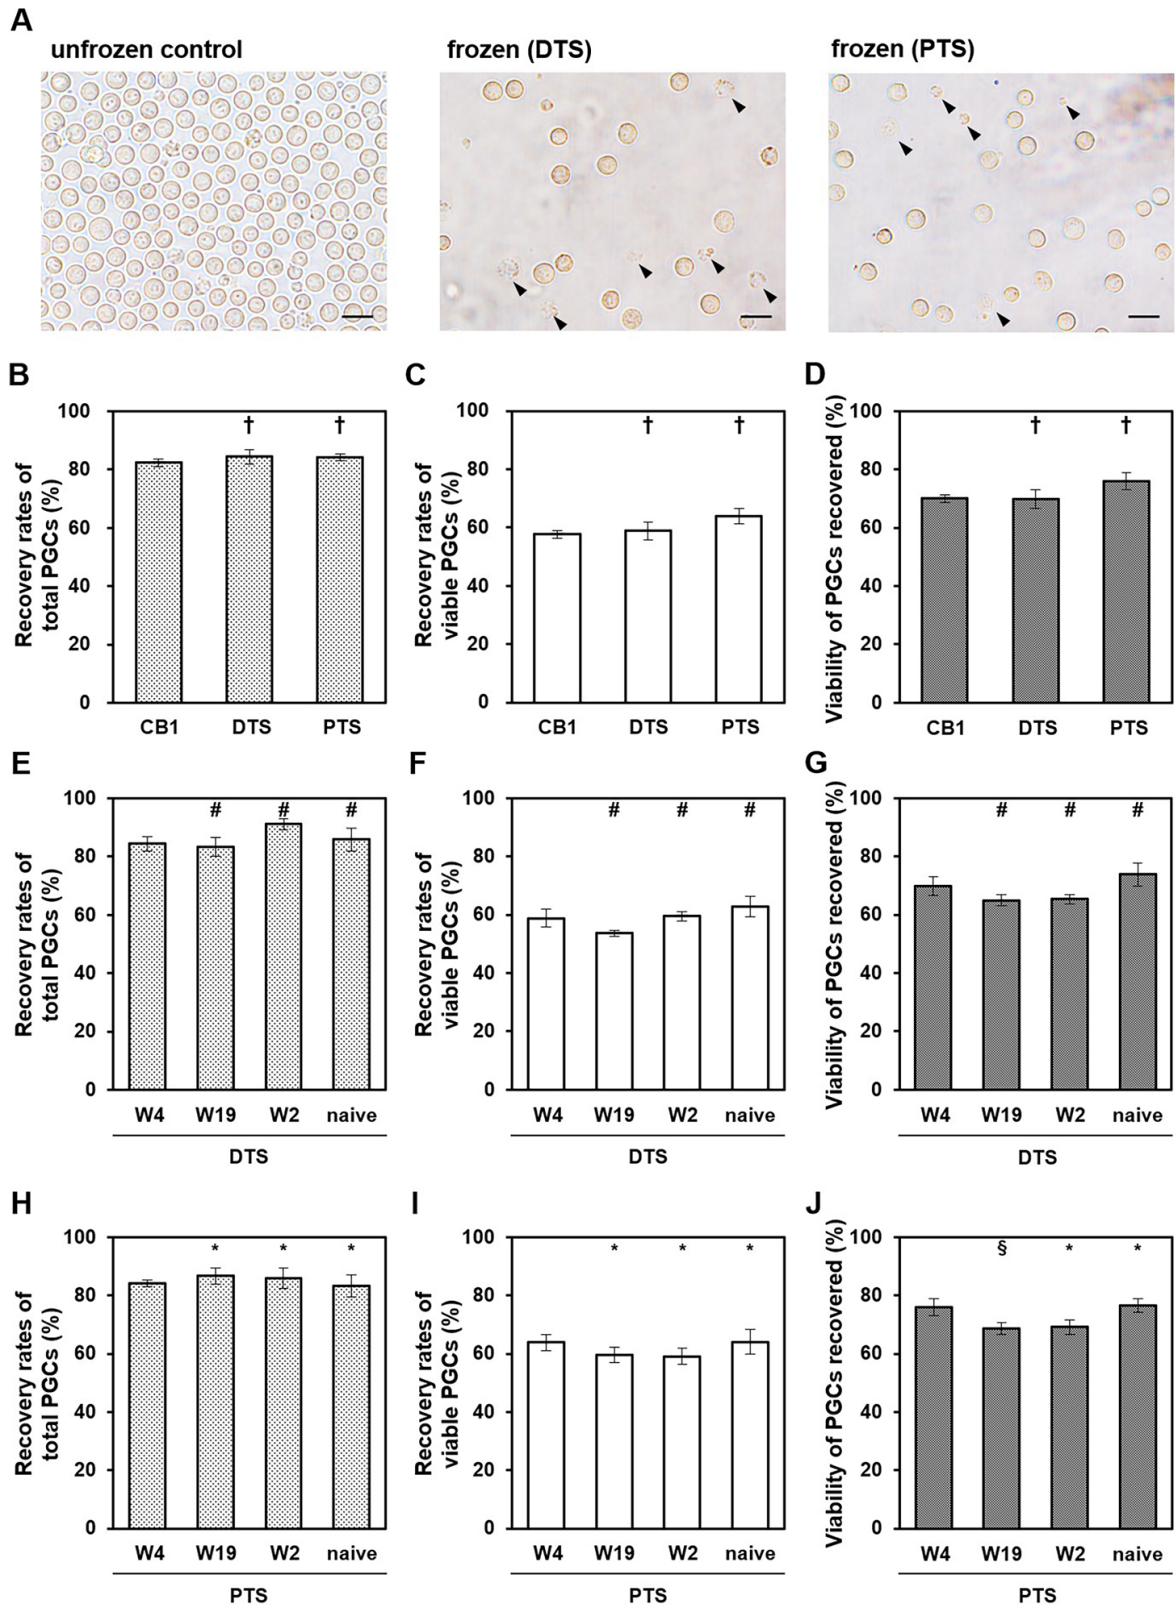

**Supplementary Fig. 1.** Feasibility of DTS and PTS cryomedia on post-thaw recovery and viability of primordial germ cells (PGCs). (A) Morphology of a PGC line (W4) without cryopreservation (unfrozen control; left) and after being frozen in DTS (middle) or PTS (bottom) cryomedia. Black arrowheads indicate ruptured PGCs. Scale bars indicate 25  $\mu\text{m}$ . (B–D) Recovery rates of total cells, including (B) dead cells and (C) viable cells, and (D) the viability of recovered cells after the cryopreservation of a PGC line (W4) in CELLBANKER<sup>®</sup> 1 (CB1), DTS, or PTS. Significance was calculated vs. CB1 (<sup>†</sup>  $P > 0.05$ ) using the Wilcoxon test. (E–J) The viability and recovery rates of three PGC lines (W4, W19, W2) and freshly isolated PGCs from blood (naive PGCs) after cryopreservation in DTS or PTS cryomedia were analyzed. Recovery rates of total cells, including (E and H) dead cells and (F and I) viable cells after thawing. (D and G) Viability of cells recovered after thawing. Significance was calculated vs. W4 in each cryomedia (DTS: <sup>#</sup>  $P > 0.05$ , PTS: \*  $P > 0.05$  and <sup>§</sup>  $P < 0.05$ ) using the Wilcoxon test. Values in (B)–(G) are presented as mean  $\pm$  SEM.

**A**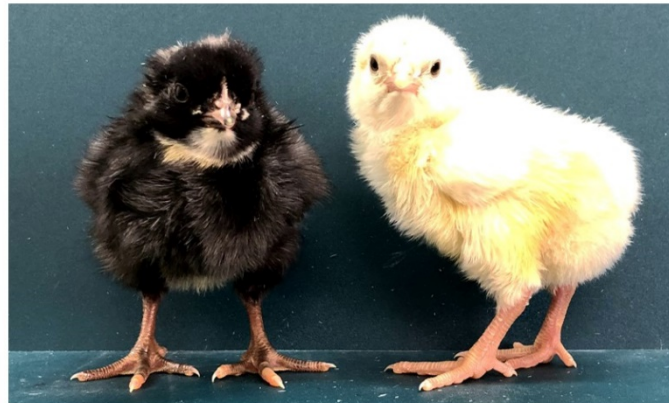**B**

| Recipient ID | Cryomedia | PGC lines | No. of white chicks<br>(Donor-derived) | No. of black chicks<br>(Recipient-derived) | Proportion of donor-<br>derived offspring (%) |
|--------------|-----------|-----------|----------------------------------------|--------------------------------------------|-----------------------------------------------|
| R404         | DTS       | W4        | 122                                    | 22                                         | 84.7                                          |
| R420         | DTS       | W4        | 2                                      | 155                                        | 1.3                                           |
| R425         | DTS       | W4        | 34                                     | 88                                         | 27.9                                          |
| R429         | DTS       | W4        | 21                                     | 102                                        | 17.1                                          |
| R442         | DTS       | W4        | 21                                     | 111                                        | 15.9                                          |
| R443         | DTS       | W4        | 8                                      | 121                                        | 6.2                                           |
| R446         | DTS       | W4        | 1                                      | 38                                         | 2.6                                           |
| R410         | DTS       | W19       | 64                                     | 31                                         | 67.4                                          |
| R411         | DTS       | W19       | 85                                     | 41                                         | 67.5                                          |
| R412         | DTS       | W19       | 65                                     | 110                                        | 37.1                                          |
| R422         | DTS       | W19       | 66                                     | 44                                         | 60.0                                          |
| R426         | DTS       | W19       | 5                                      | 2                                          | 71.4                                          |
| R428         | DTS       | W19       | 79                                     | 36                                         | 68.7                                          |
| R435         | PTS       | W4        | 26                                     | 92                                         | 22.0                                          |
| R457         | PTS       | W4        | 89                                     | 12                                         | 88.1                                          |
| R458         | PTS       | W4        | 5                                      | 5                                          | 50.0                                          |
| R432         | PTS       | W19       | 36                                     | 100                                        | 26.5                                          |
| R440         | PTS       | W19       | 95                                     | 16                                         | 85.6                                          |
| R441         | PTS       | W19       | 4                                      | 103                                        | 3.7                                           |
| R445         | PTS       | W19       | 6                                      | 100                                        | 5.7                                           |
| R447         | PTS       | W19       | 6                                      | 108                                        | 5.3                                           |
| R460         | PTS       | W19       | 13                                     | 51                                         | 20.3                                          |
| R463         | PTS       | W19       | 104                                    | 27                                         | 79.4                                          |

**Supplementary Fig. 2.** Germline transmission of cultured PGCs after freeze-thaw. (A) Phenotypes of offspring from male BPR recipients transplanted with frozen-thawed PGCs of WL by mating with normal female BPR. (right) White offspring derived from frozen-thawed WL PGCs and (left) black offspring derived from recipient BPR PGCs. (B) Percentage of male BPR recipients producing donor-derived offspring.
